# Supplementary material
Source: publisher site journal article supplement (https://www.dovepress.com/article/600999)
Supplement: Supplementary file 1 [file 600999_Supplementary%20Materials.docx]

**Supplementary figure 1: Questionnaire**

**Knowledge, Attitude, and Practice Toward Long-Term Anticoagulation in Patients With Venous Thromboembolism: A Cross-Sectional Study**

| **Part I Basic Information** | | |
| --- | --- | --- |
| **1. Your gender:** | | a. Male b. Female |
| **2. Your age:______** | | |
| **3. Your marital status:** | a. Single b. Married c. Divorced d. Widowed e. Other | |
| **4. Number of children in your family:** | a. One child b. Two children c. Three or more children | |
| **5. Your occupation status:** | a. Employed b. Retired c. Homemaker d. Other | |
| **6. Average monthly household income per person in the past year (including in-kind income, rental income, etc.): ______ Yuan** | a.≤2000  b.2000-5000  c.5000-10000  d.＞10000 | |
| **7. Duration of your venous thromboembolism (VTE):** | a. <2 years b. 2–5 years c. 5–10 years d. ≥10 years | |
| **8. Are you taking anticoagulant medication?** | a. No b. Yes | |
| **9. Do you have any of the following conditions (excluding VTE)?** | a. Hypertension b. Diabetes c. Cardiovascular or cerebrovascular disease d. Other e. None | |
| **10. Are you taking medications for other chronic diseases (excluding anticoagulants)?** | a. No b. Yes | |

| **Part II Knowledge about Anticoagulant Therapy for Venous Thrombosis**  **Please choose your level of understanding for each of the following statements** | | | | | |
| --- | --- | --- | --- | --- | --- |
| **To what extent are you familiar with the following statements:** | | | | | |
| **1. Risk of venous thrombosis** | a. Very knowledgeable | b. Knowledgeable | c. Average | d. Not knowledgeable | e. Not knowledgeable at all |
| **2. Risk of venous thrombosis recurrence** | a. Very knowledgeable | b. Knowledgeable | c. Average | d. Not knowledgeable | e. Not knowledgeable at all |
| **3. Principle of anticoagulant therapy for venous thrombosis** | a. Very knowledgeable | b. Knowledgeable | c. Average | d. Not knowledgeable | e. Not knowledgeable at all |
| **4. Relationship between anticoagulant therapy and recurrence of venous thrombosis** | a. Very knowledgeable | b. Knowledgeable | c. Average | d. Not knowledgeable | e. Not knowledgeable at all |
| **5. Types of anticoagulant drugs** | a. Very knowledgeable | b. Knowledgeable | c. Average | d. Not knowledgeable | e. Not knowledgeable at all |
| **6. Methods of using anticoagulant drugs** | a. Very knowledgeable | b. Knowledgeable | c. Average | d. Not knowledgeable | e. Not knowledgeable at all |
| **7. Safe dosage of anticoagulant drugs** | a. Very knowledgeable | b. Knowledgeable | c. Average | d. Not knowledgeable | e. Not knowledgeable at all |
| **8. Indications for anticoagulant therapy** | a. Very knowledgeable | b. Knowledgeable | c. Average | d. Not knowledgeable | e. Not knowledgeable at all |
| **9. Duration of anticoagulant therapy** | a. Very knowledgeable | b. Knowledgeable | c. Average | d. Not knowledgeable | e. Not knowledgeable at all |
| **10. Side effects of anticoagulant therapy** | a. Very knowledgeable | b. Knowledgeable | c. Average | d. Not knowledgeable | e. Not knowledgeable at all |
| **11. Alternative therapies for anticoagulant treatment** | a. Very knowledgeable | b. Knowledgeable | c. Average | d. Not knowledgeable | e. Not knowledgeable at all |
| **12. Importance of regular medication in anticoagulant therapy** | a. Very knowledgeable | b. Knowledgeable | c. Average | d. Not knowledgeable | e. Not knowledgeable at all |
| **13.15*5=85** | a. False | b. True |  |  |  |

| **Part 3 Attitudes toward Anticoagulant Therapy for Venous Thrombosis**  **Please select your response based on your attitude toward each statement:** | | | | | |
| --- | --- | --- | --- | --- | --- |
| **1. I believe that taking anticoagulant medication regularly is very important.** | a. strongly agree | b. agree | c. neutral | d. disagree | e. strongly disagree |
| **2. I think it is important to follow the doctor’s advice.** | a. strongly agree | b. agree | c. neutral | d. disagree | e. strongly disagree |
| **3. I am doubtful about my ability to adhere to anticoagulant therapy.** | a. strongly agree | b. agree | c. neutral | d. disagree | e. strongly disagree |
| **4. I feel anxious about needing to take anticoagulant drugs.** | a. strongly agree | b. agree | c. neutral | d. disagree | e. strongly disagree |
| **5. I am particularly worried about the possible side effects of anticoagulants.** | a. strongly agree | b. agree | c. neutral | d. disagree | e. strongly disagree |
| **6. I believe the cost of anticoagulant therapy is beyond my affordability.** | a. strongly agree | b. agree | c. neutral | d. disagree | e. strongly disagree |
| **7. I think missing one or two doses of anticoagulant medication is acceptable.** | a. strongly agree | b. agree | c. neutral | d. disagree | e. strongly disagree |

| **Part IV Practices in Anticoagulant Therapy**  **Please select the option that best describes your situation in each case** | | | | | |
| --- | --- | --- | --- | --- | --- |
| **1. I am able to take anticoagulant medication regularly.** | a. always | b. often | c. sometimes | d. rarely | e. never |
| **2. I follow the doctor’s instructions and take anticoagulant medication regularly.** | a. always | b. often | c. sometimes | d. rarely | e. never |
| **3. I follow the doctor’s instructions for regular check-ups.** | a. always | b. often | c. sometimes | d. rarely | e. never |
| **4. I take anticoagulants regularly, but venous thrombosis recurs.** | a. always | b. often | c. sometimes | d. rarely | e. never |
| **5. I take anticoagulants regularly, but experience complications such as bleeding (gastrointestinal bleeding, urinary tract bleeding, gum bleeding, etc.).** | a. always | b. often | c. sometimes | d. rarely | e. never |
| **6. I have missed doses of anticoagulant medication.** | a. always | b. often | c. sometimes | d. rarely | e. never |
| **7. I have stopped taking anticoagulants on my own.** | a. always | b. often | c. sometimes | d. rarely | e. never |
| **8. When complications such as bleeding occur, I stop anticoagulants.** | a. always | b. often | c. sometimes | d. rarely | e. never |
| **9. I do not take anticoagulants regularly, and venous thrombosis recurs.** | a. always | b. often | c. sometimes | d. rarely | e. never |
| **10. I have been required by my doctor to use imported anticoagulant drugs.** | a. always | b. often | c. sometimes | d. rarely | e. never |
| **11. Monthly cost of anticoagulant medication within an acceptable range:** | a.≤200 | b.200-500 | c.500-1000 | d.＞1000 |  |
| **12. Factors affecting my adherence to anticoagulant therapy (multiple choices):** | a. Side effects of anticoagulant therapy | b. Recurrence rate of venous thrombosis | c. Cost | d. Duration of therapy | e. Other |

**Supplementary table**

**Table S1. SEM fit indicators**

| **Model fit** | **Ref.** | **Measured results** |
| --- | --- | --- |
| **CMIN/DF** | 1-3 excellent，3-5 good | 2.979 |
| **RMSEA** | <0.08 good | 0.071 |
| **IFI** | >0.8 good | 0.905 |
| **TLI** | >0.8 good | 0.894 |
| **CFI** | >0.8 good | 0.905 |
